# Supplementary material for: Superhydrophobic nanocomposites from biodegradable thermoplastic starch composites (Mater-Bi®), hydrophobic nano-silica and lycopodium spores
Source: Royal Society of Chemistry journal article supplement (doi:10.1039/c4ra04117h), 2014-07-30
Supplement: c4ra04117h2.pdf [file c4ra04117h2.pdf]

# Superhydrophobic Nanocomposites from Biodegradable Thermoplastic Starch Composites (Mater-Bi®), Hydrophobic Nano-Silica and Lycopodium Spores

Athanasios Milionis,<sup>\*a</sup> Roberta Ruffilli<sup>b</sup> and Ilker S. Bayer<sup>\*\*c</sup>

<sup>a</sup> Mechanical and Aerospace Engineering, University of Virginia, 122 Engineer's Way, Charlottesville (VA), United States. E-mail: [am2vy@virginia.edu](mailto:am2vy@virginia.edu)

<sup>b</sup> Smart Materials/Nanophysics, Istituto Italiano di Tecnologia, Via Morego 30, Genoa, Italy. E-mail: [ilker.bayer@iit.it](mailto:ilker.bayer@iit.it)

<sup>c</sup> Nanochemistry, Istituto Italiano di Tecnologia, Via Morego 30, Genoa,

Video File: Mater Bi/HMFS (40/60) coating on aluminum foil. Preservation of superhydrophobic state after the foil is turned into a wrinkled ball and reused.

**Table 1** Physico-chemical characteristics of the hydrophilic and hydrophobically modified fumed silica.

| <i>Property</i>                         | <i>Unit</i>       | <i>Hydrophilic silica</i> | <i>Hydrophobic silica</i> |
|-----------------------------------------|-------------------|---------------------------|---------------------------|
| <i>Specific Surface Area (BET)</i>      | m <sup>2</sup> /g | 270-330                   | 230-290                   |
| <i>Ignition Loss (2 hrs. at 1000°C)</i> | -                 | 2.0                       | 2.5                       |
| <i>pH value in 4% aqueous solution</i>  | %                 | 3.7-5.5                   | 5.5-8.0                   |
| <i>Residual carbon content</i>          | %                 | 2.5                       | 2.5                       |
| <i>Tamped density (ISO 787-11)</i>      | g/L               | 50.0                      | 60.0                      |
| <i>SiO<sub>2</sub> content</i>          | %                 | 99.8                      | 99.8                      |

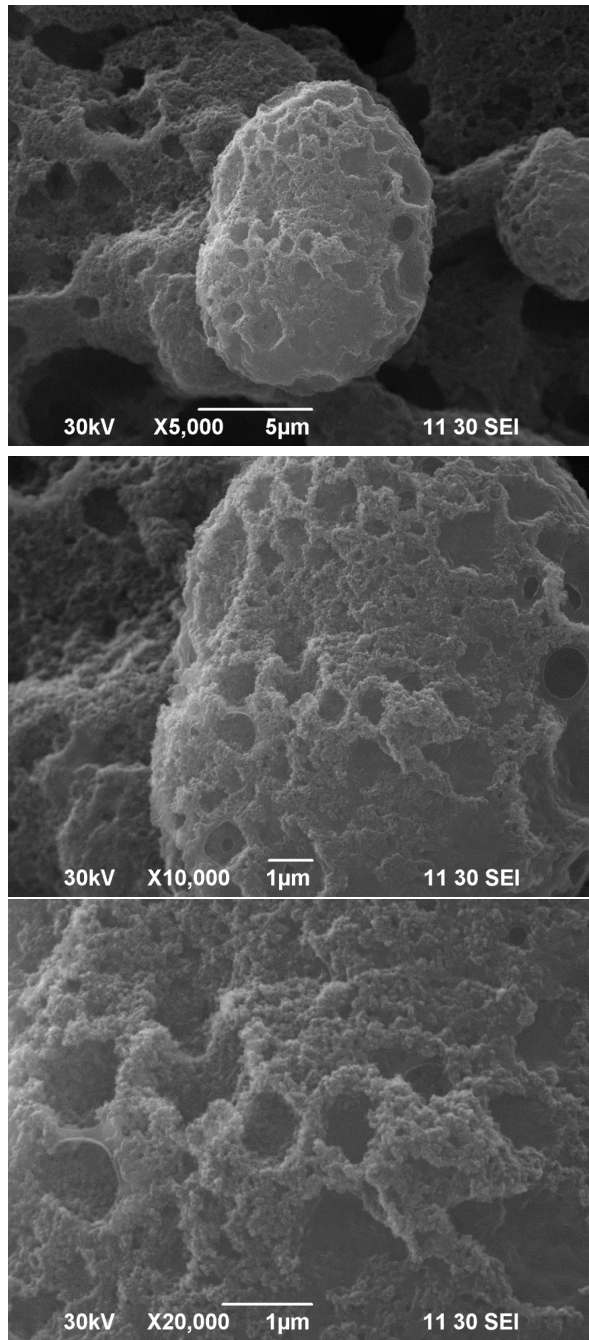

**Fig. 1:** high magnification SEM images of the hydrophobic silica nanoparticles spray deposited on a metal surface. Details show highly porous nano-scale texture along with the micron scale roughness.

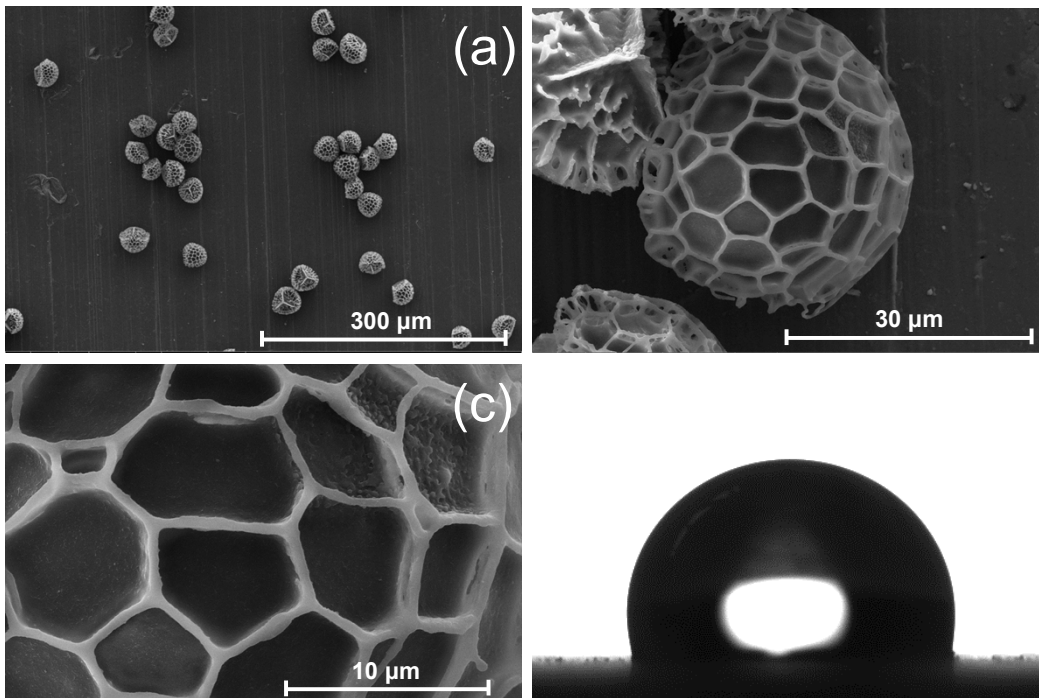

Fig. 2. (a) Low and (b.c) high magnification SEM images of the lycopodium spores. Even a few particles on a surface can increase its hydrophobicity.
